# Supplementary material
Source: PubMed Central journal article supplement (PMC2287342)
Supplement: plntphys_pp.107.111443_1.pdf [file plntphys_pp.107.111443_1.pdf]

## Supplemental Figure 1

**A**

|           |   |          |                           |                          |   |     |
|-----------|---|----------|---------------------------|--------------------------|---|-----|
| OsPHR1    | : | KQRMRWTP | ELHESFVHAVNKLGGSEKATPKGV  | LKIMKVDGLTIYHVKSHLQKYR   | : | 269 |
| OsPHR2    | : | KTRMRWTP | ELHERFVDAVNLLGGSEKATPKGV  | LKIMKADNLTIIYHVKSHLQKYR  | : | 299 |
| AtPHR1    | : | KARMRWTP | ELHDAFVEAVNSLGGSEKATPKGV  | LKIMKVEGLTIYHVKSHLQKYR   | : | 278 |
| At2g20400 | : | KGRMRWTP | ELHEVFVDAVNQLGGSEKATPKGV  | LKIMKVEGLTIFHVKSHLQKYR   | : | 284 |
| At3g04450 | : | KQRMRWTP | ELHDAFVEAINQLGGSEKATPKAV  | LKLINSPGLTVYHVKSHLQKYR   | : | 291 |
| At5g29000 | : | KQRMRWTP | ELHDAFVEAVNQLGGSEKATPKAV  | LKLNNPGLTIYHVKSHLQKYR    | : | 234 |
| At3g13040 | : | KSRMRWTP | ELHESFVKAVIKLEGPEKATPKAV  | KKLMNVEGLTIYHVKSHLQKYR   | : | 294 |
| At5g06800 | : | KTRIRWTP | QDLHEKFEVCEVNRLLGGADKATPK | RAILKRMDSGLTIFHVKSHLQKYR | : | 245 |
| CrPSR1    | : | KSRLRWTP | ELHNRVFNVAVNSLGGPDKATPKG  | ILKLMGV DGLTIYHIKSHLQKYR | : | 240 |
| At2g01060 | : | KQRLRWTP | ELHERFVDAVAQLGGPDKATPKGV  | LRVMGVQGLTIYHVKSHLQKYR   | : | 68  |
| At3g24120 | : | KPRLRWTP | ELHERFVDAVTQLGGPDKATPKT   | IMRTMGVKGGLTYHLKSHLQKFR  | : | 94  |
| At4g13640 | : | KPRLRWTP | ELHERFVDAVTQLGGPDKATPKT   | IMRTMGVKGGLTYHLKSHLQKFR  | : | 90  |
| At3g12730 | : | KPRLRWTP | ELHERFVDAVTHLGGPEKATPKT   | IMRVMGVKGGLTYHLKSHLQKFR  | : | 76  |
| At1g79430 | : | KPRLRWTP | ELHERFVDAVAQLGGPDKATPKT   | IMRVMGVKGGLTYHLKSHLQKFR  | : | 87  |
| At3g04030 | : | KPRLKWT  | PD LHERFIEAVNQLGGADKATPKT | IMKVMGIPGLTYHLKSHLQKYR   | : | 98  |
| At5g18240 | : | KPRLKWT  | PD LHERFVEAVNQLGGGDKATPKT | IMKVMGIPGLTYHLKSHLQKYR   | : | 98  |
| At1g69580 | : | KPRLKWT  | CDLHKKFIEAVNQLGGPDKATPKG  | LMKVMEIPGLTYHLKSHLQKYR   | : | 83  |
| At5g45580 | : | KPRLRWTP | ADLHDFVDAVAKLGGADKATPKS   | VLRKLMGLKGLTYHLKSHLQKYR  | : | 76  |

**B**

|           |   |           |                       |              |   |     |
|-----------|---|-----------|-----------------------|--------------|---|-----|
| OsPHR1    | : | EALRLQMEV | QKRLHEQLEIQKQLRLRIEEQ | GKYLQKMF EK  | : | 342 |
| OsPHR2    | : | EALRLQLEI | QKRLHEQLEIQRSLQLRIEEQ | GKCLQMMLEQ   | : | 375 |
| AtPHR1    | : | EALRLQMEV | QKRLHEQLEIQRNQLRIEEQ  | GKYLQMMFEK   | : | 354 |
| At2g20400 | : | ETLRLQMEH | QKRLHEQLESRLTMQLRIEEQ | GKALLMMIEK   | : | 359 |
| At3g04450 | : | EALRLQMKV | QKRLHEQLEIQRSLQLQIEEQ | GRYLQMMIEK   | : | 365 |
| At5g29000 | : | QALRLQMEV | QKRLHEQLEIQRSLQLQIEEQ | GRYLQMMFEK   | : | 319 |
| At3g13040 | : | EALRMQMEV | QKRLHEQLEVQRVQLRIEEH  | AKYLEKMLEE   | : | 374 |
| At5g06800 | : | EALQLQLD  | VQRHLHEQLEIQRNQLRIEEQ | GKQLKMMMEQ   | : | 319 |
| CrPSR1    | : | EALRFQMEI | QKRLHEQLEIQRQLQLSLEAH | GRYIASLMEQ   | : | 426 |
| At2g01060 | : | EALKLQMEV | QKRLHEQLEVQRQLQLRIEA  | QGKYLKKIIEE  | : | 144 |
| At3g24120 | : | EALRAQMEV | QRRRLHEQLEVQRRLQLRIEA | QGKYLQSTIEK  | : | 181 |
| At4g13640 | : | EALRAQMEV | QRRRLHEQLEVQRRLQLRIEA | QGKYLQSTIEK  | : | 177 |
| At5g45580 | : | EAMRHQVDA | QRFQHEQLEVQKKLQMRMEA  | QGKYLTLTLEK  | : | 197 |
| At1g79430 | : | NMNEQMEV  | QRRRLHEQLEVQRHLQLRIEA | QGKYMQSTILER | : | 165 |
| At3g04030 | : | EALQMQIEV | QRRRLHEQLEVQRHLQLRIEA | QGKYLQSVLEK  | : | 186 |
| At5g18240 | : | DALQMQIEV | QRRRLHEQLEVQRHLQLRIEA | QGKYLQSTIEK  | : | 188 |
| At1g69580 | : | EALQMMEV  | QKRLHEQIEVQRHLQVKIEA  | QGKYLQSVLMK  | : | 175 |
| At3g12730 | : | NMNEQMEV  | QRRRIEEVVIERQVNRIRIA  | QGKYMESMLEK  | : | 152 |

**Figure S1.** Alignment of the MYB (A) and predicted coiled-coil (B) conserved domains constructed by use of the CLUSTAL X 1.81 program (Thompson et al., 1997) and colored by use of the GeneDoc 3.2 program with default BLOSUM score.

**Supplemental Figure 2**

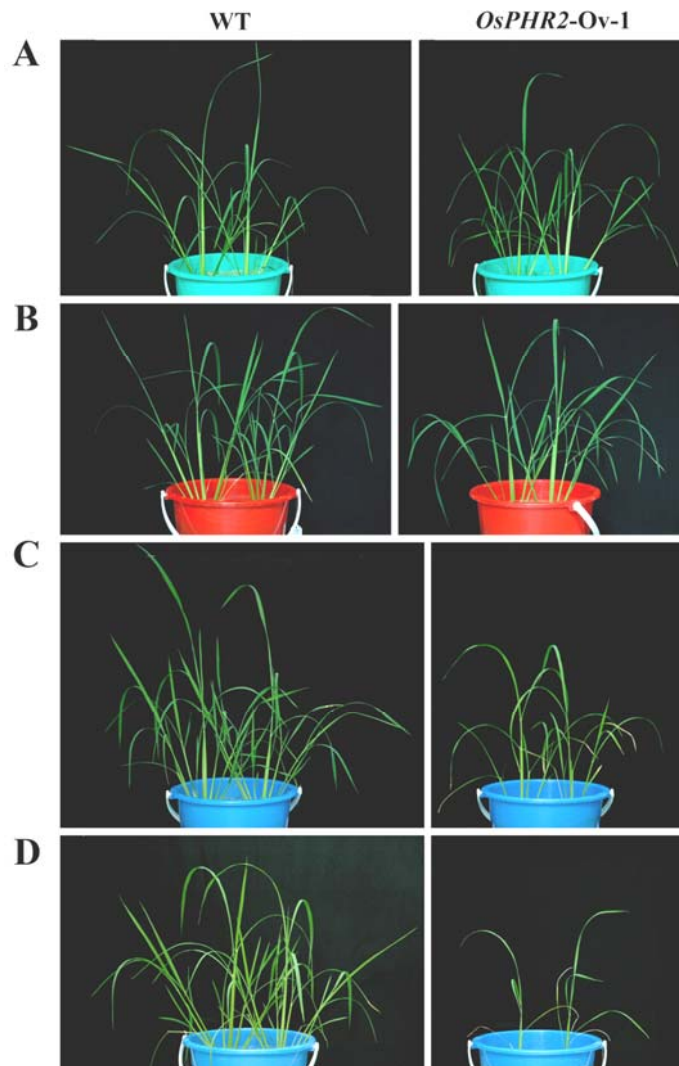

**Figure S2.** Growth performance of 45-d-old wild type (WT) and one line of *OsPHR2*-overexpressing plants (*OsPHR2-Ov-1*) in a pot experiment using acidic red soil supplied with 3 Pi levels: A, 30 mg Pi/Kg soil; B, 60 mg/Kg soil; C, 120 mg Pi/Kg soil; D, 200 mg Pi/Kg soil.

### Supplemental Figure 3

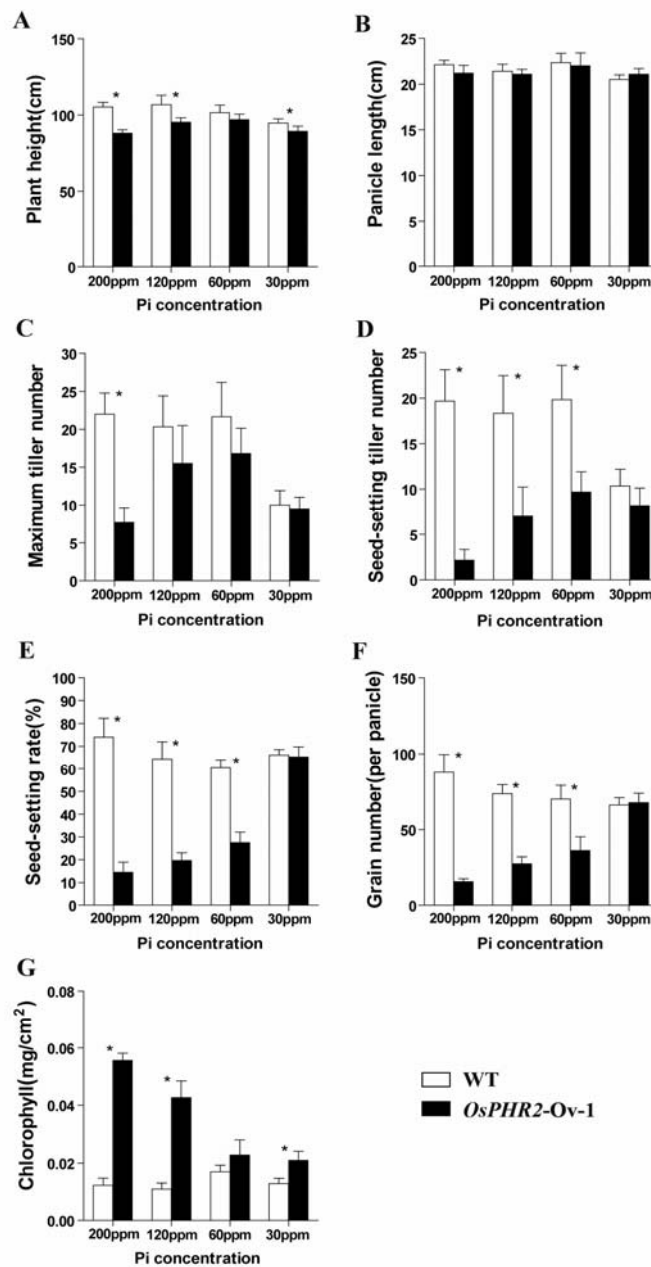

**Figure S3** Growth parameters measured from wild type (white column) and *OsPHR2-Ov-1* (black column) plants in the soil pot experiment with four Pi levels. A, Plant height; B, Panicle length; C, Maximum tiller number; D, Seed-setting tiller number; E, Seed-setting rate; F, Grain number; G, Chlorophyll. Values are mean  $\pm$  SD (n=6). Stars on the bars represent means that are statically different between WT and *OsPHR2-Ov-1* in the same treatment (p<0.01).

Supplemental Figure 4

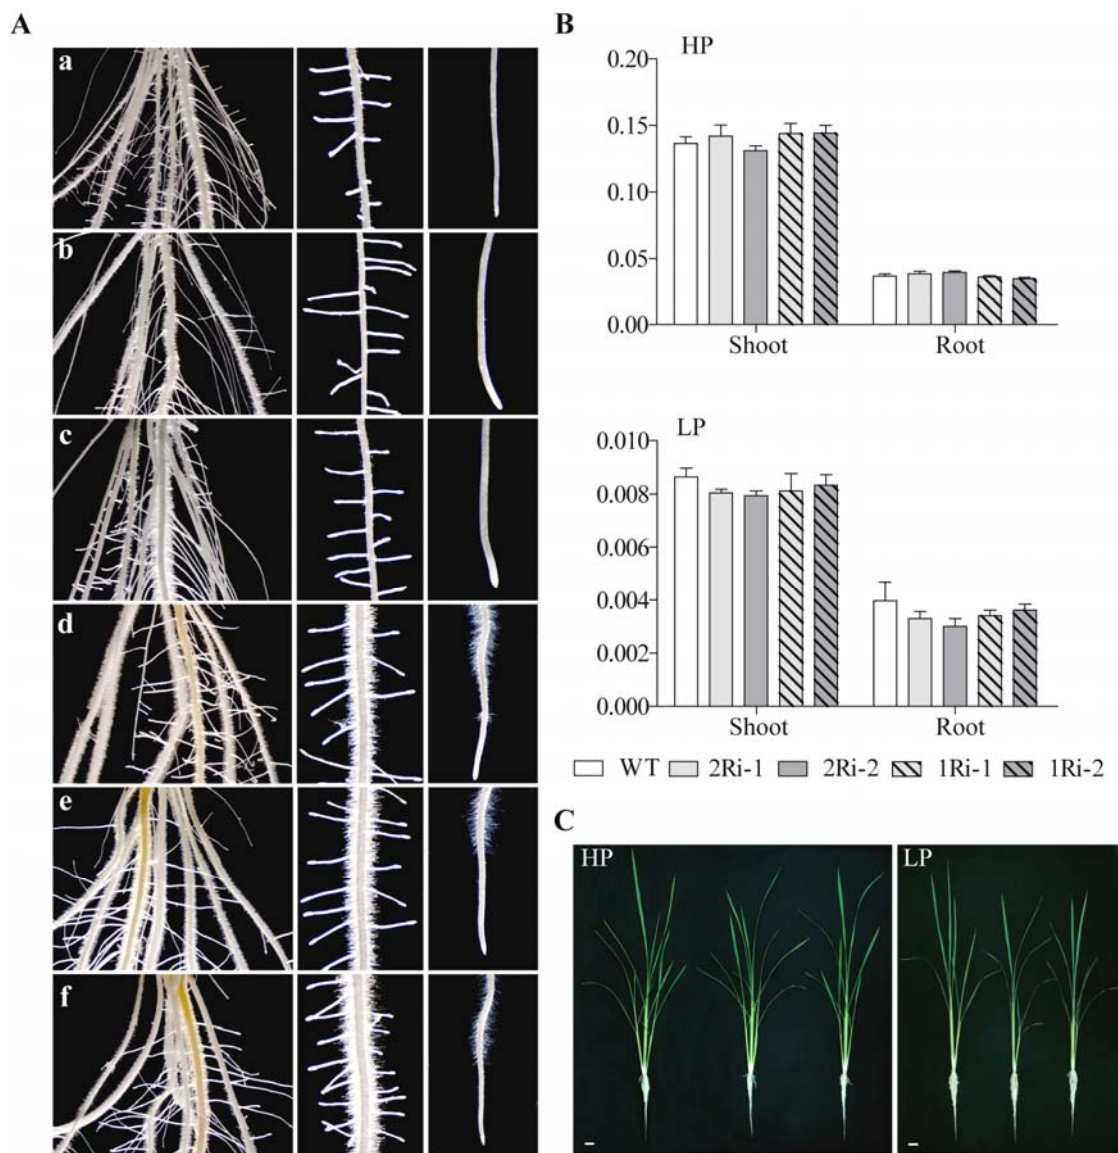

**Figure 4.** **A**, Root hair proliferation of *OsPHR1*-RNAi and *OsPHR2*-RNAi lines in the regions of root base (left panels), elongation zone (middle panels) and primary root tip (right panels) grown under Pi-supplied (b,2Ri-1 and c, 1Ri-1) and Pi-deficient (e,2Ri-1 and f, 1Ri-1) conditions compared with WT (a and d). **B** UP, Pi concentration in the shoots and roots of wild type, 2Ri-1 and 1Ri-1; Down, Pi concentration in the shoots and roots of wild type, 2Ri-1 and 1Ri-1. Error bars indicate the SD (n=5). **C** Left, 2Ri-1 and 1Ri-1 after grow under high Pi conditions (10mg/L Pi, 0.5L/plant) for 30 days; Right, 2Ri-1 and 1Ri-1 after grow under low Pi conditions (1mg/L Pi, 0.5L/plant) for 30 days. Bar=1 cm.

## Supplemental Table 1

Table S1. Primers of phosphate-starvation-inducible (*PSI*) genes used for RT-PCR analysis

| Gene           | Primer sequence (5'-3')                                        |
|----------------|----------------------------------------------------------------|
| <i>OsPHR1</i>  | F: CACAAGAAGGGAAAACCTACCGATG<br>R: TCAAGATTCATGCACTCTACGACGC   |
| <i>OsPHR2</i>  | F: CGCTTTGTAGATGCTGTCAATC<br>R: AGACCCTCATCACATCCTCATTATC      |
| <i>OsIPS1</i>  | F: AAGGGCAGGGCACACTCCACATTATC<br>R: ATTAGAGCAAGGACCGAAACACAAAC |
| <i>OsIPS2</i>  | F: CCT TCTTCTGGATTCTCTC<br>R: AGTTCACCACAAAAGATACAGTAG         |
| <i>SQD2</i>    | F: CTGAAAACGGTAATGGATAGG<br>R: AACACCACCAGCACGAGC              |
| <i>OsPAP10</i> | F: ATACTGGCAGCCGACGGATGA<br>R: GAGGGAGCTGGAGCGGAGAA            |
| <i>OsActin</i> | F: GGA ACTGGTATGGTCAAGGC<br>R: AGTCTCATGGATACCCGCAG            |

## Supplemental Table 2

Table S2. Primers of Pi transporter genes used for qRT-PCR analysis.

| Gene           | Code         | Primer sequence (5'-3')                             | UPL  |
|----------------|--------------|-----------------------------------------------------|------|
| <i>OsPT1</i>   | AF536961     | F: AGCGTTCGGGTCCTGTA<br>R: CGTTCTTGATGCCGATCC       | #116 |
| <i>OsPT5</i>   | AF536965     | F: GGCAGAACGAAATGGAG<br>R: GACGGTCTGCCTGTAGGAGT     | #160 |
| <i>OsPT7</i>   | AF536967     | F: GCTTCCTCCTCACCTTCCTT<br>R: TTCTCCCGTGACATCTCCTC  | #117 |
| <i>OsPT9</i>   | AF536969     | F: GCCTGGCGGATCATACTC<br>R: CACCAGCGCCGTATACCT      | #65  |
| <i>OsPT10</i>  | AF536971     | F: GGC GGATCATTCTCATGG<br>R: TCCACCAAAGCCGTATATCTG  | #65  |
| <i>OsPT11</i>  | AF5369672    | F: ATATCCAAGGCCTCGTTCCT<br>R: CCGATCAGCTGGATCATGT   | #91  |
| <i>OsPT12</i>  | AF536972     | F: AAATCGAGGTGGAGGAGGAG<br>R: CGAGAAGAGGCCGTAGTCC   | #1   |
| <i>OsPHO2</i>  | OS05G48390   | F: TTTTACACAAGCCACCAAAGC<br>R: TCACGAGCATGTCCAACAA  | #149 |
| <i>OsActin</i> | OS03G0718100 | F: CAACACCCCTGCTATGTACG<br>R: CATCACCAGAGTCCAACACAA | #158 |

### Supplemental Table 3

Table S3. Primers of *OsmiRNA399* and *OsPHO2* used for qRT-PCR analysis.

| Gene              | Primer sequence (5'-3')                                |
|-------------------|--------------------------------------------------------|
| <i>Os-miR399a</i> | F: GCTGGAAATGATGCTGGTAGC<br>R: CTCCTTTGGCACGAGATCTGT   |
| <i>Os-miR399d</i> | F: GGTGGCCTTTGATAGACCATCA<br>R: GCAGGCCGTTTTGGTGAAT    |
| <i>Os-miR399f</i> | F: GGCAGAGGTGATCAGATTGCA<br>R: GGCAAATCTCCTTTGGCAGAG   |
| <i>Os-miR399j</i> | F: GGAGCATGTGAAGTCTTTTGTAGC<br>R: GGCAACTCTCCTTTGGCAGA |
